# Supplementary material for: Direct Mass Spectrometric Analysis of Brominated Flame Retardants in Synthetic Polymers
Source: PubMed Central journal article supplement — ACS Omega. 2024 Jul 18;9(30):33011–21. doi: 10.1021/acsomega.4c04059 (PMC11292827; doi:10.1021/acsomega.4c04059), 2024-07-18
Supplement: ao4c04059_si_001.pdf [file ao4c04059_si_001.pdf]

## SUPPLEMENTARY INFORMATION

# Direct Mass Spectrometric Analysis of Brominated Flame Retardants in Synthetic Polymers

*Krista Grönlund<sup>1</sup>, Ville H. Nissinen<sup>1</sup>, Ilkka Rytöluoto<sup>2</sup>, Milad Mosallaei<sup>2</sup>, Joonas Mikkonen<sup>2</sup>, Kirsi Korpijärvi<sup>3</sup>, Paavo Auvinen<sup>1</sup>, Mika Suvanto<sup>1</sup>, Jarkko J. Saarinen<sup>1</sup> and Janne Jänis<sup>1\*</sup>*

<sup>1</sup>Department of Chemistry, University of Eastern Finland, Yliopistokatu 7, 80130 Joensuu, Finland

<sup>2</sup>VTT Technical Research Centre of Finland Ltd., Visiokatu 4, 33101 Tampere, Finland

<sup>3</sup>VTT Technical Research Centre of Finland Ltd., Koivurannantie 1, 40400 Jyväskylä, Finland

\*Corresponding author: [janne.janis@uef.fi](mailto:janne.janis@uef.fi)

**Table S1.** Model compound formulations.

|                    | <b>Br target concentration</b> | <b>Experimental Br concentration (XRF)</b> | <b>Ratio</b>          | <b>Target formulation</b> |                 |                                         |
|--------------------|--------------------------------|--------------------------------------------|-----------------------|---------------------------|-----------------|-----------------------------------------|
| <b>Sample</b>      | <b>[ppm]</b>                   | <b>[ppm]</b>                               | <b>Exp. vs target</b> | <b>Polymer [mg]</b>       | <b>BFR [mg]</b> | <b>Sb<sub>2</sub>O<sub>3</sub> [mg]</b> |
| ABS-0              | 0                              | 0 ± 2                                      | –                     | 10000.00                  | 0.00            | 0.00                                    |
| ABS-HBCD-1000      | 1,000                          | 675 ± 10                                   | 0.71                  | 9979.92                   | 13.38           | 6.69                                    |
| ABS-HBCD-2500      | 2,500                          | 1,982 ± 20                                 | 0.81                  | 9949.81                   | 33.46           | 16.73                                   |
| ABS-HBCD-5000      | 5,000                          | 4,395 ± 39                                 | 0.89                  | 9899.61                   | 66.92           | 33.46                                   |
| ABS-HBCD-10000     | 10,000                         | 8,610 ± 73                                 | 0.86                  | 9799.23                   | 133.85          | 66.92                                   |
| ABS-TBBPA-1000     | 1,000                          | 982 ± 12                                   | 0.98                  | 9974.48                   | 17.02           | 8.51                                    |
| ABS-TBBPA-2500     | 2,500                          | 2,251 ± 22                                 | 0.89                  | 9936.19                   | 42.54           | 21.27                                   |
| ABS-TBBPA-5000     | 5,000                          | 4,484 ± 39                                 | 0.90                  | 9872.38                   | 85.08           | 42.54                                   |
| ABS-TBBPA-10000    | 10,000                         | 8,914 ± 77                                 | 0.89                  | 9744.76                   | 170.16          | 85.08                                   |
| ABS-decaBDE-1000   | 1,000                          | 916 ± 12                                   | 0.92                  | 9981.99                   | 12.00           | 6.00                                    |
| ABS-decaBDE-2500   | 2,500                          | 2,109 ± 21                                 | 0.84                  | 9954.99                   | 30.01           | 15.00                                   |
| ABS-decaBDE-5000   | 5,000                          | 4,311 ± 38                                 | 0.86                  | 9909.97                   | 60.02           | 30.01                                   |
| ABS-decaBDE-10000  | 10,000                         | 8,750 ± 75                                 | 0.87                  | 9819.94                   | 120.04          | 60.02                                   |
| HIPS-0             | 0                              | 9 ± 2                                      | –                     | 10000.00                  | 0.00            | 0.00                                    |
| HIPS-HBCD-1000     | 1,000                          | 656 ± 10                                   | 0.66                  | 9979.92                   | 13.38           | 6.69                                    |
| HIPS-HBCD-2500     | 2,500                          | 1,688 ± 18                                 | 0.68                  | 9949.81                   | 33.46           | 16.73                                   |
| HIPS-HBCD-5000     | 5,000                          | 3,860 ± 34                                 | 0.78                  | 9899.61                   | 66.92           | 33.46                                   |
| HIPS-HBCD-10000    | 10,000                         | 8,282 ± 71                                 | 0.83                  | 9799.23                   | 133.85          | 66.92                                   |
| HIPS-TBBPA-1000    | 1,000                          | 877 ± 11                                   | 0.88                  | 9974.48                   | 17.02           | 8.51                                    |
| HIPS-TBBPA-2500    | 2,500                          | 2,033 ± 20                                 | 0.81                  | 9936.19                   | 42.54           | 21.27                                   |
| HIPS-TBBPA-5000    | 5,000                          | 4,334 ± 38                                 | 0.87                  | 9872.38                   | 85.08           | 42.54                                   |
| HIPS-TBBPA-10000   | 10,000                         | 8,609 ± 75                                 | 0.86                  | 9744.76                   | 170.16          | 85.08                                   |
| HIPS-decaBDE-1000  | 1,000                          | 793 ± 11                                   | 0.79                  | 9981.99                   | 12.00           | 6.00                                    |
| HIPS-decaBDE-2500  | 2,500                          | 2,043 ± 21                                 | 0.82                  | 9954.99                   | 30.01           | 15.00                                   |
| HIPS-decaBDE-5000  | 5,000                          | 4,148 ± 37                                 | 0.83                  | 9909.97                   | 60.02           | 30.01                                   |
| HIPS-decaBDE-10000 | 10,000                         | 8,773 ± 74                                 | 0.88                  | 9819.94                   | 120.04          | 60.02                                   |

**Table S2.** Utilized parameters in DIP-APCI-MS analysis.

| <b>Ion source</b>     |                       | <b>Collision cell</b> |                       |
|-----------------------|-----------------------|-----------------------|-----------------------|
| End plate offset      | 500 V                 | Collision energy      | 10.0 eV               |
| Capillary             | 4000 V                | Collision RF          | 600.0 V <sub>pp</sub> |
| Corona                | 4000 nA               | Transfer time         | 140.0 μs              |
| Nebulizer             | 2.0 Bar               | Pre pulse storage     | 12.0 μs               |
| Dry gas               | 5.0 L/min             | <b>Flight tube</b>    |                       |
| Dry temperature       | 200 °C                | Flight tube           | 9900.0 V              |
| Vaporizer temperature | 150-450 °C            | <b>Reflector</b>      |                       |
| <b>Transfer</b>       |                       | Decelerator           | 882.0 V               |
| Deflection 1 Delta    | 40.0 V                | Reflector             | 2500.0 V              |
| Funnel 1 RF           | 300.0 V <sub>pp</sub> | <b>Detector</b>       |                       |
| Funnel 2 RF           | 400.0 V <sub>pp</sub> | TOF                   | 2268.9 V              |
| Multipole RF          | 250.0 V <sub>pp</sub> | <b>Corrector</b>      |                       |
| <b>Quadrupole</b>     |                       | Fill                  | 64.7 V                |
| Ion energy            | 5.0 eV                | Extract               | -611.1 V              |
| Low mass              | 100.00 m/z            | Lens                  | -6454.3 V             |

**Table S3.** Utilized calibration lists for HIPS and ABS samples.

| <b>HIPS</b>                     |            | <b>ABS</b>                                     |            |
|---------------------------------|------------|------------------------------------------------|------------|
| Ion formula                     | m/z        | Ion formula                                    | m/z        |
| C <sub>13</sub> H <sub>9</sub>  | 165.069877 | C <sub>11</sub> H <sub>12</sub> N              | 158.096426 |
| C <sub>14</sub> H <sub>10</sub> | 178.077702 | C <sub>14</sub> H <sub>15</sub> N <sub>2</sub> | 211.122975 |
| C <sub>16</sub> H <sub>15</sub> | 207.116827 | C <sub>19</sub> H <sub>20</sub> N              | 262.159026 |
| C <sub>24</sub> H <sub>24</sub> | 312.187252 | C <sub>22</sub> H <sub>23</sub> N <sub>2</sub> | 315.185575 |
| C <sub>25</sub> H <sub>24</sub> | 324.187252 | C <sub>25</sub> H <sub>26</sub> N <sub>3</sub> | 368.212124 |
| C <sub>32</sub> H <sub>31</sub> | 415.242027 | C <sub>30</sub> H <sub>31</sub> N <sub>2</sub> | 419.248175 |
| C <sub>33</sub> H <sub>32</sub> | 428.249852 | C <sub>33</sub> H <sub>34</sub> N <sub>3</sub> | 472.274725 |
| C <sub>41</sub> H <sub>40</sub> | 532.312453 | C <sub>36</sub> H <sub>37</sub> N <sub>4</sub> | 525.301274 |
| C <sub>49</sub> H <sub>48</sub> | 636.375053 | C <sub>41</sub> H <sub>42</sub> N <sub>3</sub> | 576.337325 |
| C <sub>57</sub> H <sub>56</sub> | 740.437653 | C <sub>44</sub> H <sub>45</sub> N <sub>4</sub> | 629.363874 |
| C <sub>65</sub> H <sub>64</sub> | 844.500253 | C <sub>47</sub> H <sub>48</sub> N <sub>5</sub> | 682.390423 |
| C <sub>73</sub> H <sub>72</sub> | 948.562854 | C <sub>52</sub> H <sub>53</sub> N <sub>4</sub> | 733.426474 |
|                                 |            | C <sub>55</sub> H <sub>56</sub> N <sub>5</sub> | 786.453023 |
|                                 |            | C <sub>58</sub> H <sub>59</sub> N <sub>6</sub> | 839.479572 |
|                                 |            | C <sub>63</sub> H <sub>64</sub> N <sub>5</sub> | 890.515624 |

**Table S4.** Summary of selected signals observed in DIP-MS analysis of ABS-decaBDE sample (Br concentration of 1,000 ppm).

| Experimental m/z | Theoretical m/z | Error (ppm) | Observed ion         | Ion formula                                    | Proposed compound**           | Observation time frame (min)*** |
|------------------|-----------------|-------------|----------------------|------------------------------------------------|-------------------------------|---------------------------------|
| 881.259062*      | 881.257073      | 2.26        | M <sup>+</sup> •     | C <sub>12</sub> HBr <sub>9</sub> O             | nonaBDE                       | 5.5–7.0                         |
| 959.170006*      | 959.167571      | 2.54        | M <sup>+</sup> •     | C <sub>12</sub> Br <sub>10</sub> O             | decaBDE                       | 5.5–7.0                         |
| 270.234020       | 270.234202      | -0.67       | M <sup>+</sup> •     | C <sub>20</sub> H <sub>30</sub>                | B <sub>5</sub>                | 7.0–8.5                         |
| 324.281936       | 324.281153      | 2.41        | M <sup>+</sup> •     | C <sub>24</sub> H <sub>36</sub>                | B <sub>6</sub>                | 7.0–8.5                         |
| 378.328252       | 378.328103      | 0.39        | M <sup>+</sup> •     | C <sub>28</sub> H <sub>42</sub>                | B <sub>7</sub>                | 7.0–8.5                         |
| 432.375130       | 432.375053      | 0.18        | M <sup>+</sup> •     | C <sub>32</sub> H <sub>48</sub>                | B <sub>8</sub>                | 7.0–8.5                         |
| 486.421991       | 486.422003      | -0.02       | M <sup>+</sup> •     | C <sub>36</sub> H <sub>54</sub>                | B <sub>9</sub>                | 7.0–8.5                         |
| 540.469117       | 540.468953      | 0.30        | M <sup>+</sup> •     | C <sub>40</sub> H <sub>60</sub>                | B <sub>10</sub>               | 7.0–8.5                         |
| 156.080700       | 156.080776      | -0.49       | [M + H] <sup>+</sup> | C <sub>11</sub> H <sub>10</sub> N              | AS                            | 8.5–10.0                        |
| 210.115029       | 210.115150      | -0.58       | M <sup>+</sup> •     | C <sub>14</sub> H <sub>14</sub> N <sub>2</sub> | A <sub>2</sub> S              | 8.5–10.0                        |
| 261.151354       | 261.151201      | 0.59        | M <sup>+</sup> •     | C <sub>19</sub> H <sub>19</sub> N              | AS <sub>2</sub>               | 8.5–10.0                        |
| 314.178076       | 314.177750      | 1.04        | M <sup>+</sup> •     | C <sub>22</sub> H <sub>22</sub> N <sub>2</sub> | A <sub>2</sub> S <sub>2</sub> | 8.5–10.0                        |
| 365.213930       | 365.213801      | 0.35        | M <sup>+</sup> •     | C <sub>27</sub> H <sub>27</sub> N              | AS <sub>3</sub>               | 8.5–10.0                        |
| 418.240289       | 418.240350      | -0.15       | M <sup>+</sup> •     | C <sub>30</sub> H <sub>30</sub> N <sub>2</sub> | A <sub>2</sub> S <sub>3</sub> | 8.5–10.0                        |
| 471.266989       | 471.266899      | 0.19        | M <sup>+</sup> •     | C <sub>33</sub> H <sub>33</sub> N <sub>3</sub> | A <sub>3</sub> S <sub>3</sub> | 8.5–10.0                        |
| 522.302608       | 522.302951      | -0.66       | M <sup>+</sup> •     | C <sub>38</sub> H <sub>38</sub> N <sub>2</sub> | A <sub>2</sub> S <sub>4</sub> | 8.5–10.0                        |

\* Instead of monoisotopic peak, the most abundant signal is reported in the table.

\*\* The observed polymer fragments were marked with abbreviation A<sub>a</sub>B<sub>b</sub>S<sub>s</sub>, in which a, b, and s corresponds to the number of acrylonitrile, butadiene, and styrene monomers, respectively.

\*\*\* The observation time frame refers to temperature ramp program utilized in the DIP-MS analyses: time frames 5.5–7.0 min, 7.0–8.5 min and 8.5–10.0 min correspond to approximately 350, 400 and 450 °C, respectively.

**Table S5.** Summary of signals observed in HIPS-decaBDE sample (Br concentration of 1,000 ppm) during the DIP-MS analysis.

| Experimental m/z | Theoretical m/z | Error (ppm) | Observed ion         | Ion formula                                      | Proposed compound** | Observation time frame(min)*** |
|------------------|-----------------|-------------|----------------------|--------------------------------------------------|---------------------|--------------------------------|
| 530.469526       | 530.469347      | 0.34        | M <sup>+</sup>       | C <sub>35</sub> H <sub>62</sub> O <sub>3</sub>   | Irganox 1076        | 5.5–7.0                        |
| 662.446238       | 662.445849      | 0.59        | M <sup>+</sup>       | C <sub>42</sub> H <sub>63</sub> O <sub>4</sub> P | Irgafos 168 oxide   | 5.5–7.0                        |
| 881.257641*      | 881.257073      | 0.64        | M <sup>+</sup>       | C <sub>12</sub> HBr <sub>9</sub> O               | nonaBDE             | 5.5–7.0                        |
| 959.167551*      | 959.167571      | -0.02       | M <sup>+</sup>       | C <sub>12</sub> Br <sub>10</sub> O               | decaBDE             | 5.5–7.0                        |
| 270.233973       | 270.234202      | -0.85       | M <sup>+</sup>       | C <sub>20</sub> H <sub>30</sub>                  | B <sub>5</sub>      | 7.0–8.5                        |
| 324.281062       | 324.281153      | -0.28       | M <sup>+</sup>       | C <sub>24</sub> H <sub>36</sub>                  | B <sub>6</sub>      | 7.0–8.5                        |
| 378.328110       | 378.328103      | 0.02        | M <sup>+</sup>       | C <sub>28</sub> H <sub>42</sub>                  | B <sub>7</sub>      | 7.0–8.5                        |
| 432.374988       | 432.375053      | -0.15       | M <sup>+</sup>       | C <sub>32</sub> H <sub>48</sub>                  | B <sub>8</sub>      | 7.0–8.5                        |
| 486.421913       | 486.422003      | -0.19       | M <sup>+</sup>       | C <sub>36</sub> H <sub>54</sub>                  | B <sub>9</sub>      | 7.0–8.5                        |
| 207.116834       | 207.116827      | 0.03        | [M + H] <sup>+</sup> | C <sub>16</sub> H <sub>15</sub>                  | S <sub>2</sub>      | 8.5–10.0                       |
| 312.187281       | 312.187252      | 0.09        | M <sup>+</sup>       | C <sub>24</sub> H <sub>24</sub>                  | S <sub>3</sub>      | 8.5–10.0                       |
| 415.241766       | 415.242027      | -0.63       | [M + H] <sup>+</sup> | C <sub>32</sub> H <sub>31</sub>                  | S <sub>4</sub>      | 8.5–10.0                       |
| 520.312282       | 520.312453      | -0.33       | M <sup>+</sup>       | C <sub>40</sub> H <sub>40</sub>                  | S <sub>5</sub>      | 8.5–10.0                       |

\* Instead of monoisotopic peak, the most abundant signal is reported in the table.

\*\* The observed polymer fragments were marked with abbreviations B<sub>b</sub> and S<sub>s</sub>, in which b and s corresponds to the number of butadiene and styrene monomers, respectively.

\*\*\* The observation time frame refers to temperature ramp program utilized in the DIP-MS analyses: time frames 5.5–7.0 min, 7.0–8.5 min and 8.5–10.0 min correspond to approximately 350, 400 and 450 °C, respectively.

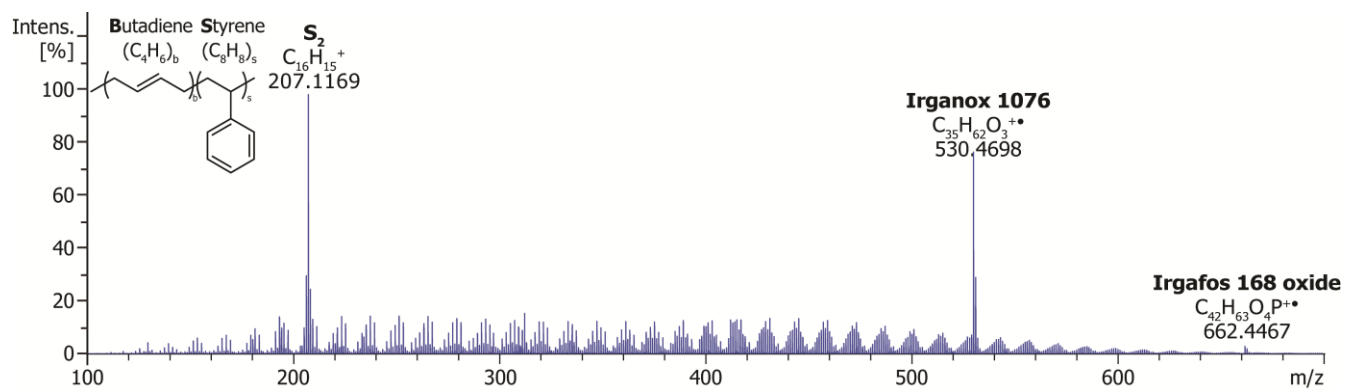

**Figure S1.** Averaged mass spectrum (time frame of 5.5–7.0 min) from DIP-MS measurement of HIPS sample without any BFRs.

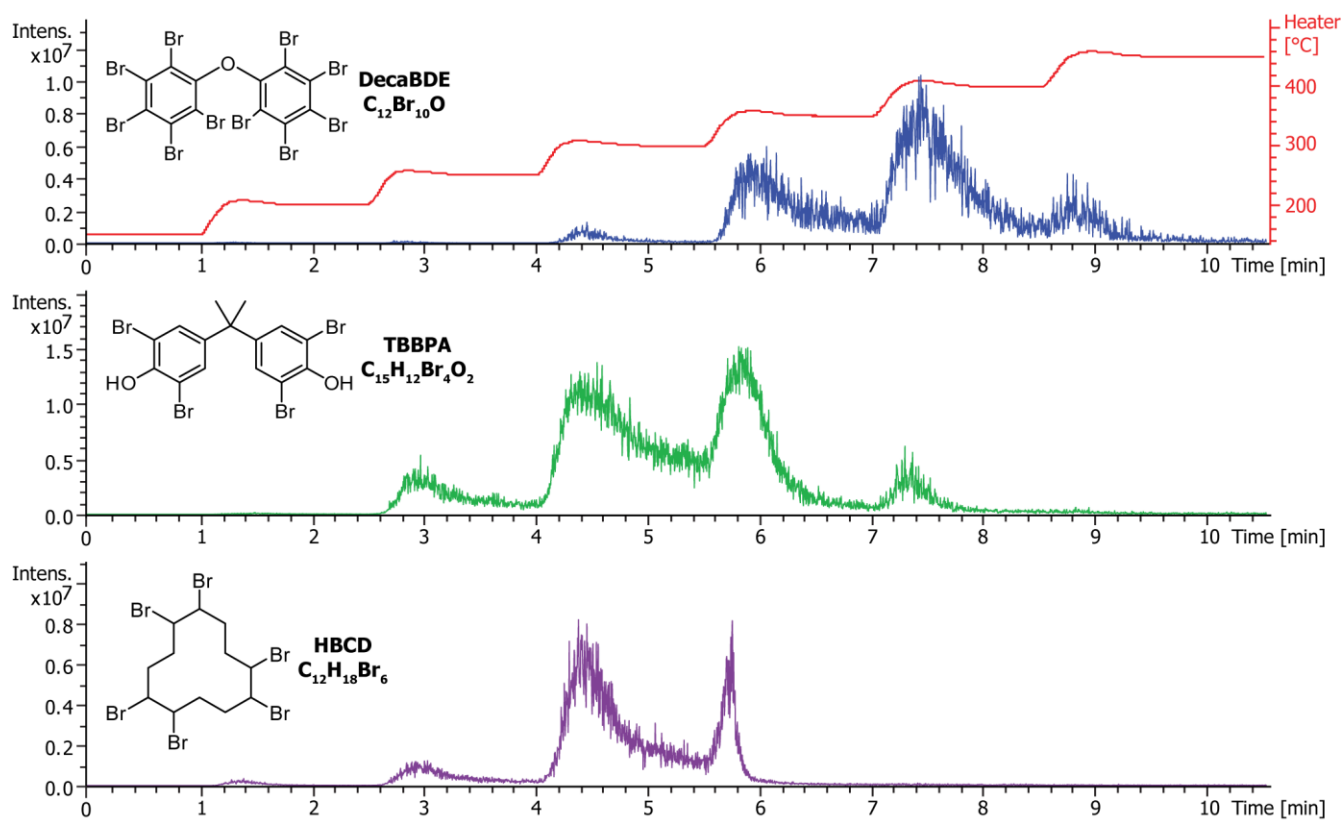

**Figure S2.** Total ion chromatograms from DIP-MS analysis of decaBDE (top), TBBPA (middle) and HBCD (bottom). The utilized APCI vaporizer temperature program is presented as a red line in the utmost chromatogram.

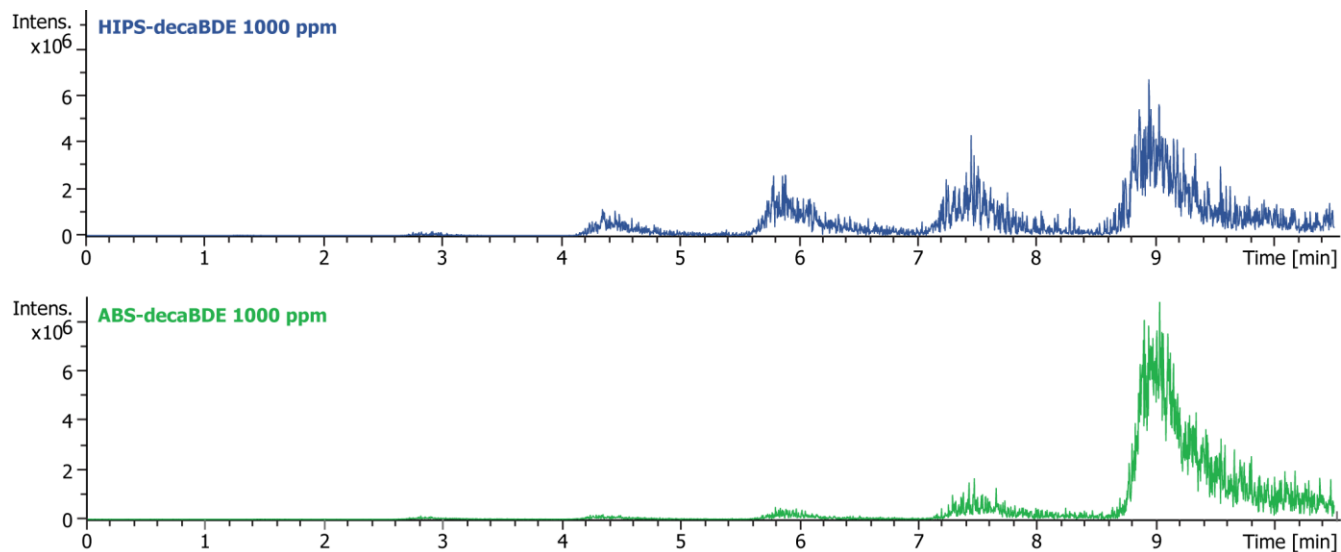

**Figure S3.** Total ion chromatograms from DIP-MS analysis of HIPS-decaBDE and ABS-decaBDE samples having Br concentrations of 1,000 ppm.

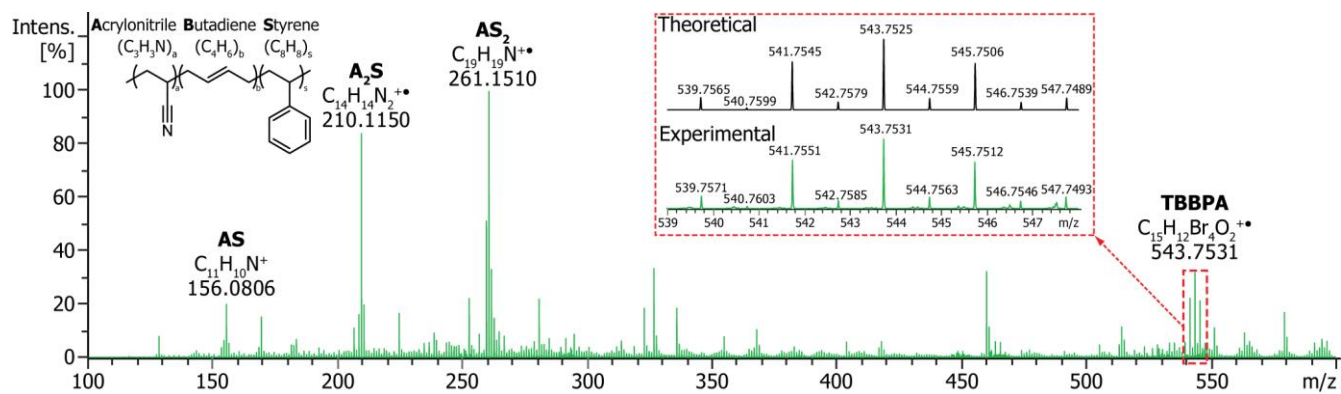

**Figure S4.** Averaged mass spectrum (time frame of 5.5–7.0 min) from DIP-MS measurement of ABS-TBBPA sample (Br concentration 1,000 ppm).



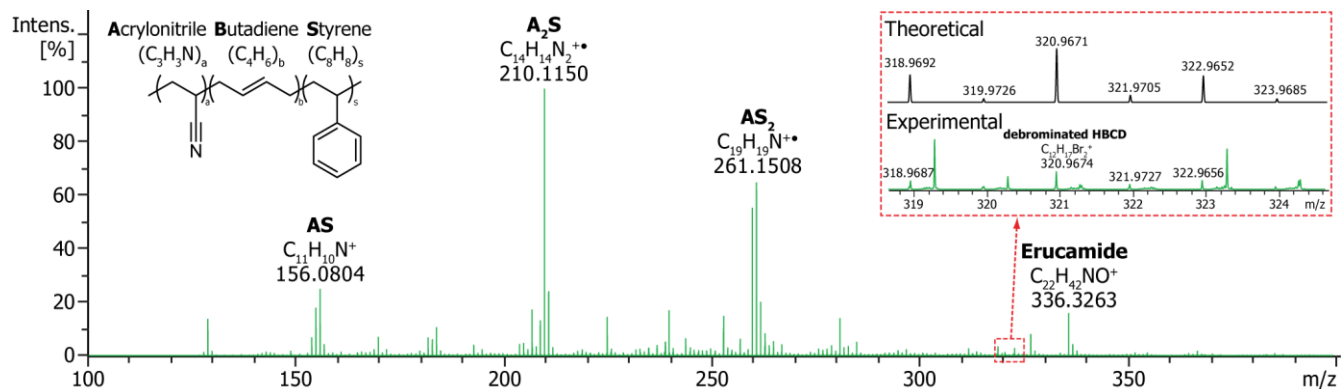

**Figure S5.** Averaged mass spectrum (time frame of 5.5–7.0 min) from DIP-MS measurement of ABS-HBCD sample (Br concentration 1,000 ppm).

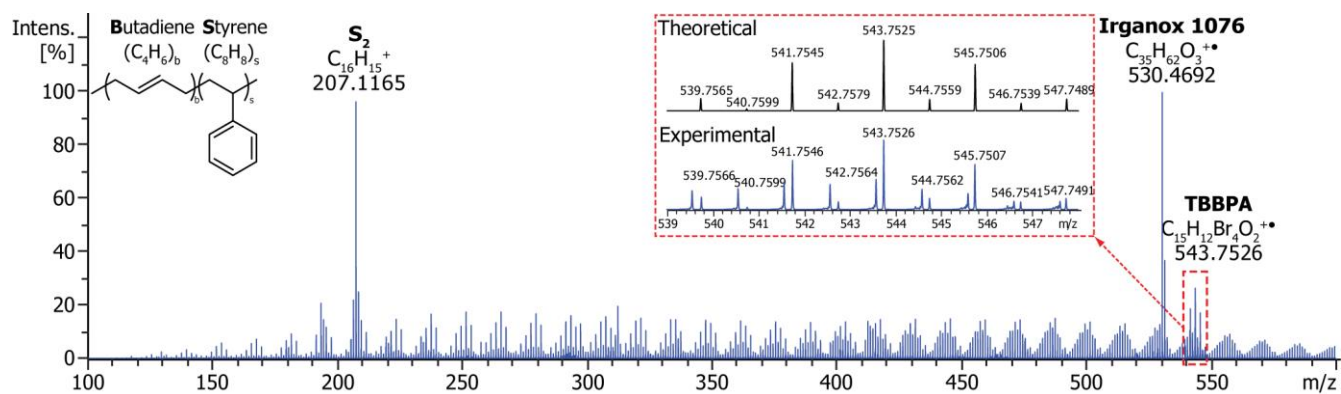

**Figure S6.** Averaged mass spectrum (time frame of 5.5–7.0 min) from DIP-MS measurement of HIPS-TBBPA sample (Br concentration 1,000 ppm).

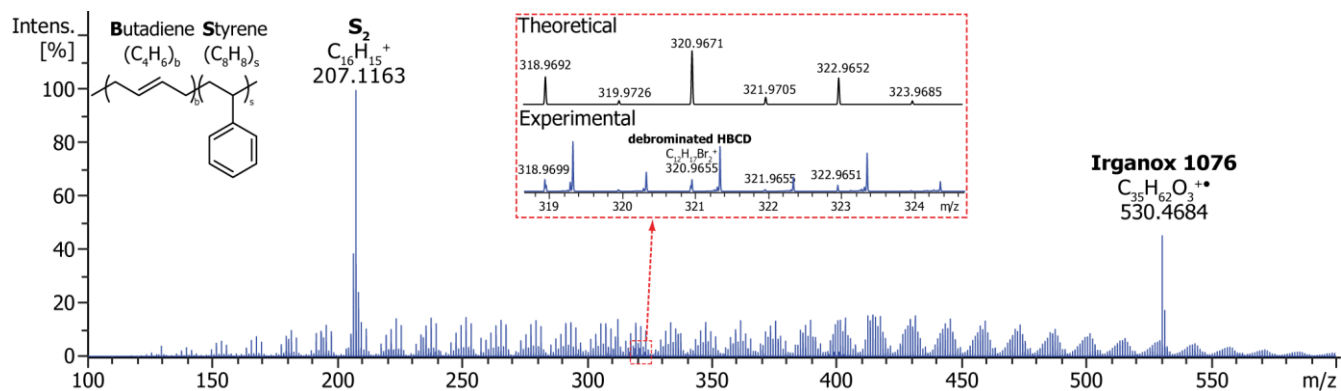

**Figure S7.** Averaged mass spectrum (time frame of 5.5–7.0 min) from DIP-MS measurement of HIPS-HBCD sample (Br concentration of 1,000 ppm).

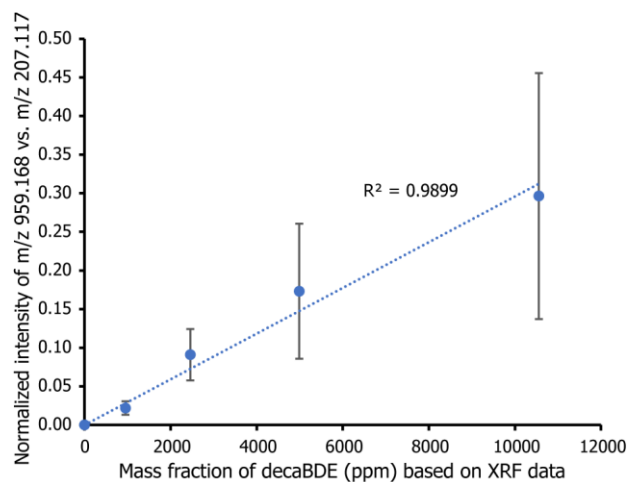

**Figure S8.** Normalized intensity of  $m/z$  959.168 (decaBDE) versus  $m/z$  207.117 (styrene dimer) compared to the mass fraction of decaBDE based on XRF data. The MS data was collected using a small sample size ( $<0.1$  mg) and the error bars represent standard deviation of the mean between five parallel measurements.
